# Supplementary material for: The impact of multilingual science popularization videos based on the transtheoretical model and whole-cycle management concepts on the self-management behavior capacity of liver cancer patients from ethnic minorities
Source: Research Square preprint supplement (doi:10.21203/rs.3.rs-5684928/v1), 2024-12-30
Supplement: Supplementary file 1 [file 0027d9d41b4f783117fa9eaa.pdf]

**Supplemental Table 1** Total scores of self-management behaviors and scores of each dimension before and after intervention across different demographic characteristics.

[illegible]

|                                                       |          |          |          |          |            |          |          |          |          |            |
|-------------------------------------------------------|----------|----------|----------|----------|------------|----------|----------|----------|----------|------------|
| Organs/institutions                                   | 54.4±6.7 | 34.5±6.5 | 16.0±2.3 | 15.6±3.0 | 120.5±14.5 | 60.8±4.5 | 38.8±3.8 | 17.6±1.7 | 17.8±1.9 | 135.0±9.0  |
| Enterprises/business people                           | 51.2±4.6 | 37.8±6.7 | 14.8±2.8 | 14.8±4.0 | 118.6±9.3  | 57.6±5.5 | 42.0±2.1 | 16.6±1.9 | 17.2±2.4 | 133.4±4.0  |
| Student                                               | 56.0±1.0 | 34.5±5.5 | 14.5±1.5 | 16.0±1.0 | 121.0±9.0  | 59.5±0.5 | 39.0±3.0 | 17.5±0.5 | 18.5±0.5 | 134.5±3.5  |
| Agricultural laborer                                  | 48.8±7.3 | 30.6±7.6 | 15.0±3.2 | 13.4±3.7 | 107.8±17.6 | 58.2±4.5 | 36.8±4.3 | 16.9±1.9 | 16.9±2.0 | 128.6±9.7  |
| retirees                                              | 52.6±3.9 | 33.0±5.6 | 15.6±2.2 | 13.9±2.4 | 115.1±10.4 | 59.3±3.4 | 38.2±3.2 | 17.6±1.5 | 17.3±1.3 | 132.3±7.8  |
| Private enterprise                                    | 38.0±3.0 | 19.5±1.5 | 13.0±1.0 | 10.5±1.5 | 81.0±1.0   | 56.0±2.0 | 33.5±0.5 | 17.0±1.0 | 16.0±0.0 | 122.5±3.5  |
| Other                                                 | 50.4±7.6 | 31.1±7.2 | 14.8±3.2 | 14.0±4.1 | 110.2±18.2 | 58.1±5.1 | 37.3±3.6 | 17.0±1.8 | 16.8±2.3 | 129.2±10.2 |
| Medical insurance                                     |          |          |          |          |            |          |          |          |          |            |
| Basic medical insurance for employees                 | 53.2±6.6 | 33.7±6.6 | 15.6±2.6 | 15.1±3.2 | 117.6±15.2 | 59.9±4.6 | 38.5±3.8 | 17.4±1.8 | 17.5±2.0 | 133.2±9.2  |
| Basic medical insurance for urban and rural residents | 49.5±7.8 | 30.8±7.7 | 14.9±3.2 | 13.6±3.9 | 109.0±18.3 | 58.3±4.8 | 37.2±4.1 | 17.1±1.8 | 16.8±2.2 | 129.3±10.0 |
| No health insurance                                   | 50.0±5.9 | 31.0±5.0 | 15.0±2.2 | 13.3±1.9 | 109.3±13.9 | 58.0±4.1 | 37.0±2.9 | 17.3±0.5 | 15.7±1.2 | 128.0±8.0  |
| Smoking                                               |          |          |          |          |            |          |          |          |          |            |
| Yes                                                   | 48.9±8.0 | 31.1±7.2 | 14.8±3.0 | 13.8±3.7 | 108.7±18.3 | 57.7±5.5 | 37.3±3.9 | 17.0±1.7 | 16.6±2.2 | 128.7±10.2 |
| No                                                    | 52.3±7.0 | 32.8±7.3 | 15.5±2.8 | 14.6±3.6 | 115.1±16.6 | 59.6±4.4 | 38.0±4.0 | 17.3±1.8 | 17.3±2.0 | 132.3±9.4  |
| drinking                                              |          |          |          |          |            |          |          |          |          |            |

|     |        |        |        |        |         |        |        |        |        |         |
|-----|--------|--------|--------|--------|---------|--------|--------|--------|--------|---------|
| Yes | 50.25± | 31.15± | 15.07± | 13.85± | 110.33± | 58.82± | 37.55± | 17.29± | 16.73± | 130.38± |
|     | 8.23   | 6.78   | 3.07   | 3.71   | 17.84   | 4.90   | 3.32   | 1.67   | 2.19   | 9.47    |
| No  | 51.89± | 32.79± | 15.37± | 14.59± | 114.65± | 59.25± | 37.97± | 17.21± | 17.29± | 131.72± |
|     | 7.03   | 7.40   | 2.83   | 3.58   | 16.87   | 4.70   | 4.16   | 1.85   | 2.05   | 9.84    |

P1: Health Behavior Management; P2: Disease Cognition and Perception; P3: Psychological and Emotional Management;  
P4: Information Acquisition and Decision-Making Participation

**Supplemental Table 2** Comparison of total scores and scores in various dimensions of self-management behavior before and after intervention by gender.

| Characteristics, | 男              | 女              | p    |
|------------------|----------------|----------------|------|
| Mean $\pm$ SD    | (n = 94)       | (n = 119)      |      |
| P1               | 8.1 $\pm$ 4.4  | 7.3 $\pm$ 3.6  | 0.13 |
| P2               | 5.8 $\pm$ 3.8  | 5.3 $\pm$ 4.1  | 0.34 |
| P3               | 2.1 $\pm$ 1.7  | 1.8 $\pm$ 1.5  | 0.12 |
| P4               | 3.1 $\pm$ 2.0  | 2.5 $\pm$ 2.0  | 0.04 |
| Total score      | 19.1 $\pm$ 9.6 | 16.8 $\pm$ 8.5 | 0.07 |

P1: Health Behavior Management; P2: Disease Cognition and Perception; P3: Psychological and Emotional Management; P4: Information Acquisition and Decision-Making Participation

**Supplemental Table 3** Comparison of total scores and scores in various dimensions of self-management behavior before and after intervention by age.

| Characteristics, | $\leq 30$ (n = 46) | 31-40          | 41-50          | 51-60           | $> 60$         | p         |
|------------------|--------------------|----------------|----------------|-----------------|----------------|-----------|
| Mean $\pm$ SD    |                    | (n = 44)       | (n = 34)       | (n = 40)        | (n = 49)       |           |
| P1               | 7.1 $\pm$ 3.5      | 7.0 $\pm$ 3.7  | 7.5 $\pm$ 4.0  | 8.8 $\pm$ 4.9   | 8.1 $\pm$ 4.0  | 0.24      |
| P2               | 5.5 $\pm$ 4.1      | 4.5 $\pm$ 3.2  | 6.1 $\pm$ 5.0  | 5.8 $\pm$ 3.9   | 5.7 $\pm$ 4.0  | 0.44      |
| P3               | 1.6 $\pm$ 1.5      | 2.0 $\pm$ 1.4  | 2.0 $\pm$ 1.8  | 2.4 $\pm$ 1.8   | 1.8 $\pm$ 1.6  | 0.25      |
| P4               | 2.0 $\pm$ 1.5      | 2.2 $\pm$ 1.6  | 3.0 $\pm$ 2.2  | 3.0 $\pm$ 1.8   | 3.5 $\pm$ 2.3  | $< 0.001$ |
| Total score      | 16.2 $\pm$ 8.0     | 15.7 $\pm$ 8.0 | 18.7 $\pm$ 9.8 | 19.9 $\pm$ 10.1 | 19.0 $\pm$ 9.1 | 0.13      |

P1: Health Behavior Management; P2: Disease Cognition and Perception; P3: Psychological and Emotional Management; P4: Information Acquisition and Decision-Making Participation

**Supplemental Table 4** Comparison of total scores and scores in various dimensions of self-management behavior before and after intervention by educational.

| Characteristics,<br>Mean $\pm$ SD | Junior high school<br>and below<br>(n = 94) | High<br>school/technical<br>secondary school<br>(n = 21) | College/bachel<br>or's degree<br>(n = 93) | Master<br>degree or<br>above<br>(n = 5) | p     |
|-----------------------------------|---------------------------------------------|----------------------------------------------------------|-------------------------------------------|-----------------------------------------|-------|
| P1                                | 8.7 $\pm$ 4.3                               | 8.0 $\pm$ 4.2                                            | 6.7 $\pm$ 3.5                             | 6.4 $\pm$ 2.2                           | 0.006 |
| P2                                | 6.1 $\pm$ 4.0                               | 5.5 $\pm$ 4.4                                            | 4.9 $\pm$ 3.9                             | 6.4 $\pm$ 2.1                           | 0.23  |
| P3                                | 2.1 $\pm$ 1.8                               | 1.7 $\pm$ 1.4                                            | 1.8 $\pm$ 1.4                             | 2.4 $\pm$ 1.8                           | 0.31  |
| P4                                | 3.3 $\pm$ 2.1                               | 2.4 $\pm$ 1.7                                            | 2.3 $\pm$ 1.8                             | 1.2 $\pm$ 1.6                           | 0.002 |
| Total score                       | 20.1 $\pm$ 9.5                              | 17.6 $\pm$ 10.2                                          | 15.7 $\pm$ 8.0                            | 16.4 $\pm$ 5.3                          | 0.008 |

P1: Health Behavior Management; P2: Disease Cognition and Perception; P3: Psychological and Emotional Management; P4: Information Acquisition and Decision-Making Participation

**Supplemental Table 5** Comparison of total scores and scores in various dimensions of self-management behavior before and after intervention by Occupations.

| Characteristics,<br>Mean $\pm$ SD | Organs/inst<br>itutions<br>(n = 74) | Enterprises<br>/business<br>people<br>(n = 5) | Students<br>(n = 2) | Agricultural<br>laborer<br>(n = 56) | retirees<br>(n = 15) | Private<br>enterprise(<br>n = 2) | Other<br>(n = 59) | p       |
|-----------------------------------|-------------------------------------|-----------------------------------------------|---------------------|-------------------------------------|----------------------|----------------------------------|-------------------|---------|
| P1                                | 6.4 $\pm$ 3.2                       | 6.4 $\pm$ 2.1                                 | 3.5 $\pm$ 2.1       | 9.5 $\pm$ 4.6                       | 6.7 $\pm$ 2.5        | 18.0 $\pm$ 1.4                   | 7.7 $\pm$ 3.8     | < 0.001 |
| P2                                | 4.3 $\pm$ 3.3                       | 4.2 $\pm$ 5.7                                 | 4.5 $\pm$ 3.5       | 6.2 $\pm$ 4.0                       | 5.2 $\pm$ 3.3        | 14.0 $\pm$ 2.8                   | 6.2 $\pm$ 4.3     | 0.003   |
| P3                                | 1.6 $\pm$ 1.2                       | 1.8 $\pm$ 1.1                                 | 3.0 $\pm$ 1.4       | 2.0 $\pm$ 1.9                       | 2.0 $\pm$ 1.3        | 4.0 $\pm$ 0.0                    | 2.2 $\pm$ 1.8     | 0.23    |
| P4                                | 2.1 $\pm$ 1.5                       | 2.4 $\pm$ 2.1                                 | 2.5 $\pm$ 0.7       | 3.2 $\pm$ 2.2                       | 3.3 $\pm$ 1.8        | 5.5 $\pm$ 2.1                    | 2.8 $\pm$ 2.2     | 0.01    |
| Total score                       | 14.5 $\pm$ 6.6                      | 14.8 $\pm$ 9.4                                | 13.5 $\pm$ 7.8      | 20.9 $\pm$ 10.2                     | 17.2 $\pm$ 5.0       | 41.5 $\pm$ 3.5                   | 19.0 $\pm$ 9.3    | < 0.001 |

P1: Health Behavior Management; P2: Disease Cognition and Perception; P3: Psychological and Emotional Management; P4: Information Acquisition and Decision-Making Participation

**Supplemental Table 6** Comparison of total scores and scores in various dimensions of self-management behavior before and after intervention by Medical insurance.

| Characteristics,<br>Mean $\pm$ SD | Basic medical insurance<br>for employees<br>(n = 113) | Basic medical insurance<br>for urban and rural<br>residents<br>(n = 97) | No health<br>insurance<br>(n = 3) | p       |
|-----------------------------------|-------------------------------------------------------|-------------------------------------------------------------------------|-----------------------------------|---------|
| P1                                | 6.7 $\pm$ 3.2                                         | 8.8 $\pm$ 4.7                                                           | 8.0 $\pm$ 2.6                     | 0.001   |
| P2                                | 4.8 $\pm$ 3.6                                         | 6.3 $\pm$ 4.4                                                           | 6.0 $\pm$ 2.6                     | 0.02    |
| P3                                | 1.8 $\pm$ 1.3                                         | 2.1 $\pm$ 1.9                                                           | 2.3 $\pm$ 2.3                     | 0.21    |
| P4                                | 2.4 $\pm$ 1.7                                         | 3.1 $\pm$ 2.3                                                           | 2.3 $\pm$ 1.5                     | 0.03    |
| Total score                       | 15.7 $\pm$ 7.2                                        | 20.4 $\pm$ 10.4                                                         | 18.7 $\pm$ 7.6                    | < 0.001 |

P1: Health Behavior Management; P2: Disease Cognition and Perception; P3: Psychological and Emotional Management; P4: Information Acquisition and Decision-Making Participation

**Supplemental Table 7** Comparison of total scores and scores in various dimensions of self-management behavior before and after intervention by Smoking.

| Characteristics,<br>Mean $\pm$ SD | Smoking<br>(n = 53) | No Smoking<br>(n = 160) | p     |
|-----------------------------------|---------------------|-------------------------|-------|
| P1                                | 8.8 $\pm$ 4.5       | 7.3 $\pm$ 3.8           | 0.019 |
| P2                                | 6.2 $\pm$ 4.3       | 5.2 $\pm$ 3.9           | 0.114 |
| P3                                | 2.2 $\pm$ 1.8       | 1.8 $\pm$ 1.5           | 0.153 |

|             |             |            |       |
|-------------|-------------|------------|-------|
| P4          | 2.8 ± 2.0   | 2.7 ± 2.0  | 0.771 |
| Total score | 20.1 ± 10.4 | 17.1 ± 8.5 | 0.04  |

P1: Health Behavior Management; P2: Disease Cognition and Perception; P3: Psychological and Emotional Management; P4: Information Acquisition and Decision-Making Participation

**Supplemental Table 8** Comparison of total scores and scores in various dimensions of self-management behavior before and after intervention by drinking.

| Characteristics,<br>Mean ± SD | drinking<br>(n = 55) | No drinking<br>(n = 158) | p    |
|-------------------------------|----------------------|--------------------------|------|
| P1                            | 8.6 ± 4.6            | 7.4 ± 3.8                | 0.06 |
| P2                            | 6.4 ± 4.3            | 5.2 ± 3.8                | 0.05 |
| P3                            | 2.2 ± 1.9            | 1.8 ± 1.5                | 0.13 |
| P4                            | 2.9 ± 2.1            | 2.7 ± 2.0                | 0.57 |
| Total score                   | 20.1 ± 10.3          | 17.1 ± 8.5               | 0.04 |

P1: Health Behavior Management; P2: Disease Cognition and Perception; P3: Psychological and Emotional Management; P4: Information Acquisition and Decision-Making Participation
